# Supplementary material
Source: PubMed Central journal article supplement (PMC1270003)
Supplement: pgen.0010043.st007.pdf [file pgen.0010043.st007.pdf]

Table S7. Accuracy, sensitivity, specificity and predictive value of hybridizations with the genomic sequences of Sheba and 162.0

| Genome | Hybridization | zfp (No. of CDSs)   |                     |                  | Accuracy |
|--------|---------------|---------------------|---------------------|------------------|----------|
|        |               | >91                 | <91                 | Predictive Value |          |
| Sheba  | +             | 1263 (TP)           | 51 (FP)             | Pos = 95.6%      | 93.3%    |
|        | -             | 58 (FN)             | 257 (TN)            | Neg = 83.4%      |          |
|        |               | Sensitivity = 95.6% | Specificity = 83.4% |                  |          |
|        |               |                     |                     |                  |          |
| 162.0  | +             | 1417 (TP)           | 36 (FP)             | Pos = 97.8%      | 95.8%    |
|        | -             | 32 (FN)             | 146 (TN)            | Neg = 80.2%      |          |
|        |               | Sensitivity = 97.8% | Specificity = 80.2% |                  |          |
|        |               |                     |                     |                  |          |

NOTE: TP, true positive; FP, false positive; TN, true negative; FN, false negative. Accuracy = (TN+TP)/(TN+TP+FN+FP).

Pos = Positive Predictive Value [TP/(TP+FP)]; Neg = Negative Predictive Value [TN/(FN+TN)].

Sensitivity [TP/(TP+FN)]; Specificity [TN/(FP+TN)]. Hybridization = observed hybridization with microarray.
