# Supplementary material
Source: PubMed Central journal article supplement (PMC1270003)

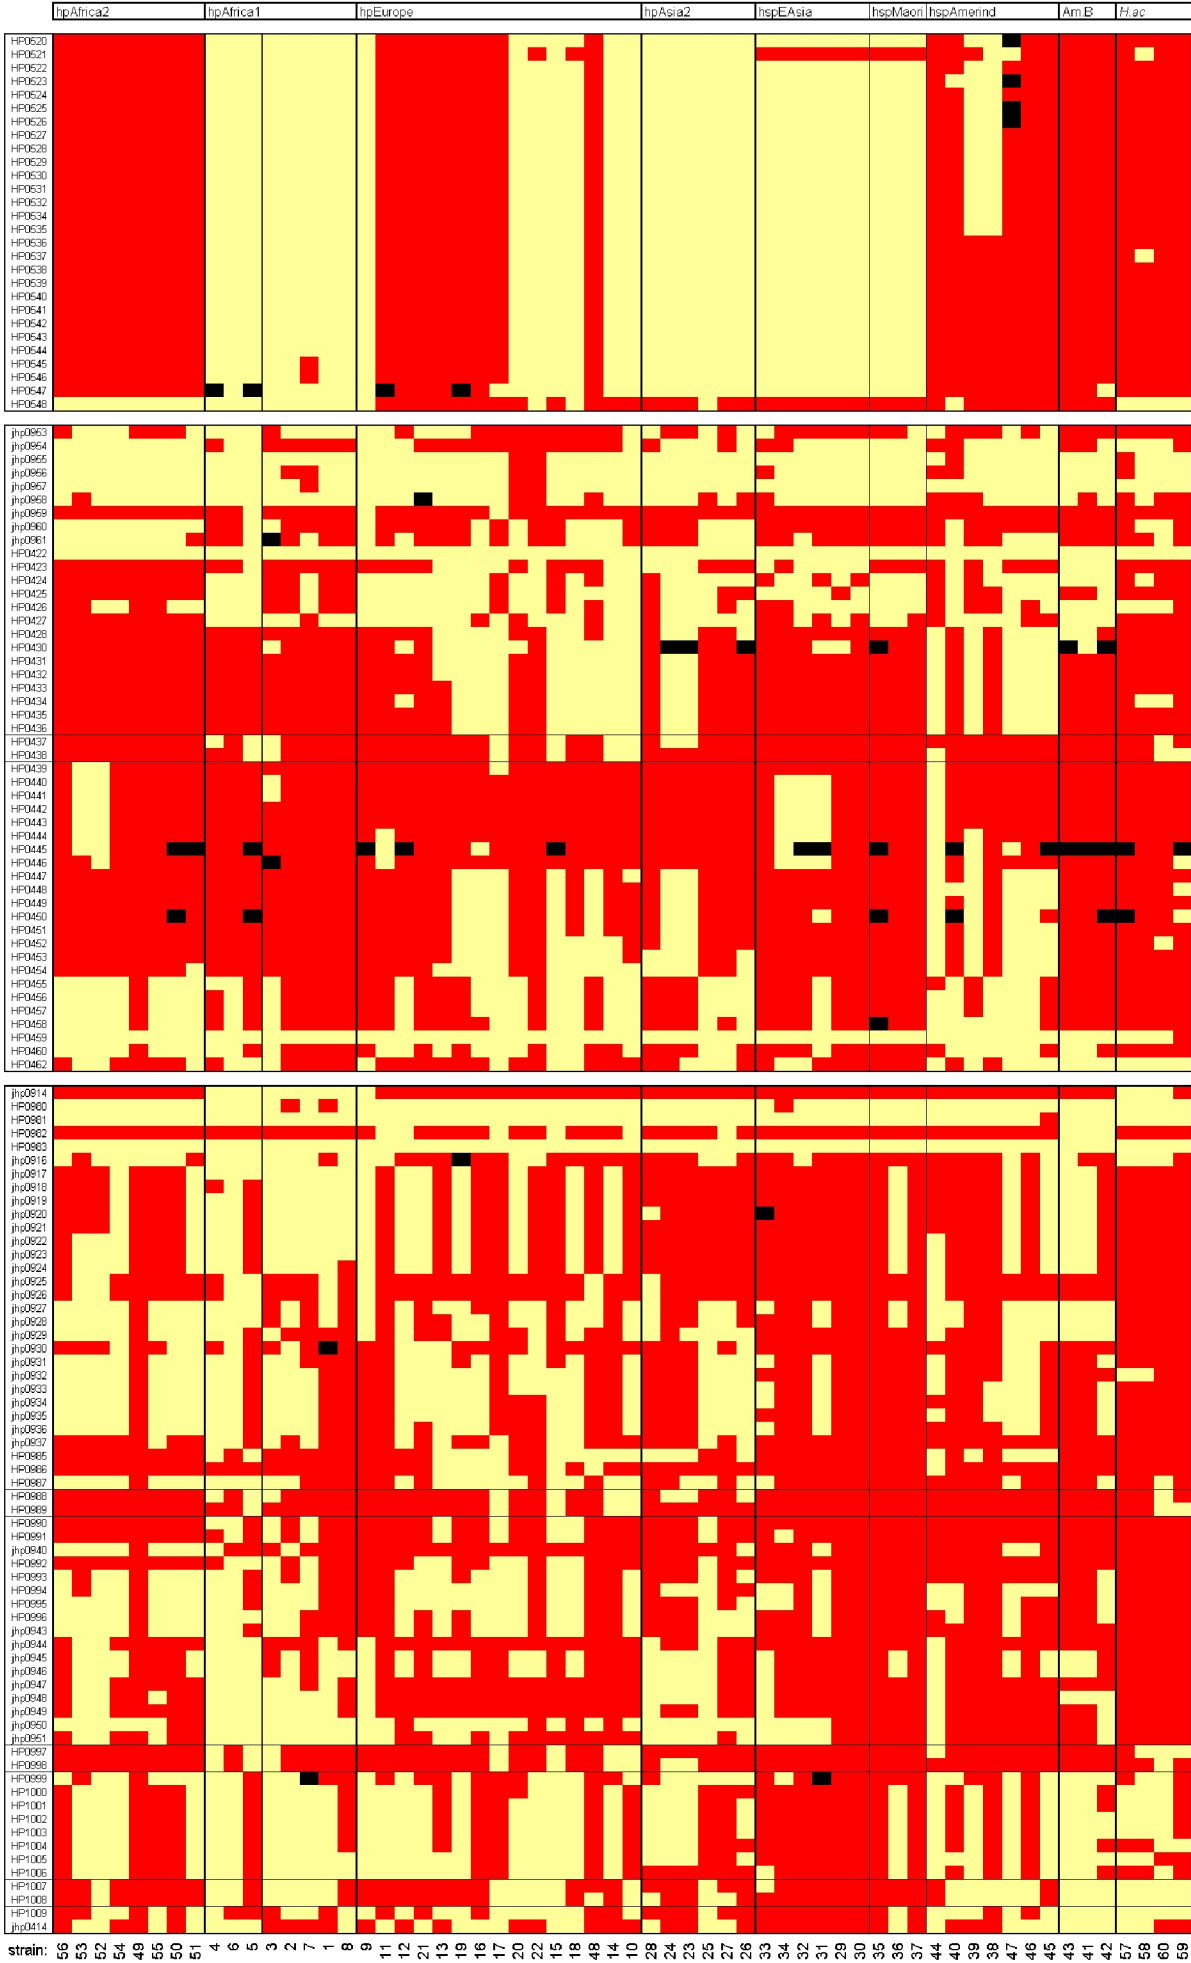

cag PAI

plasticity zone1  
IS605

plasticity zone2  
IS605

IS605  
IS200

strain: 56 53 52 54 49 55 50 51 4 6 5 3 2 7 1 8 9 11 12 21 13 19 16 17 20 22 15 18 48 14 10 28 24 23 25 27 26 33 34 32 31 29 30 35 36 37 44 40 39 38 47 46 45 43 41 42 57 58 60 59

Supplement: pgen.0010043.sg001.pdf [file pgen.0010043.sg001.pdf]

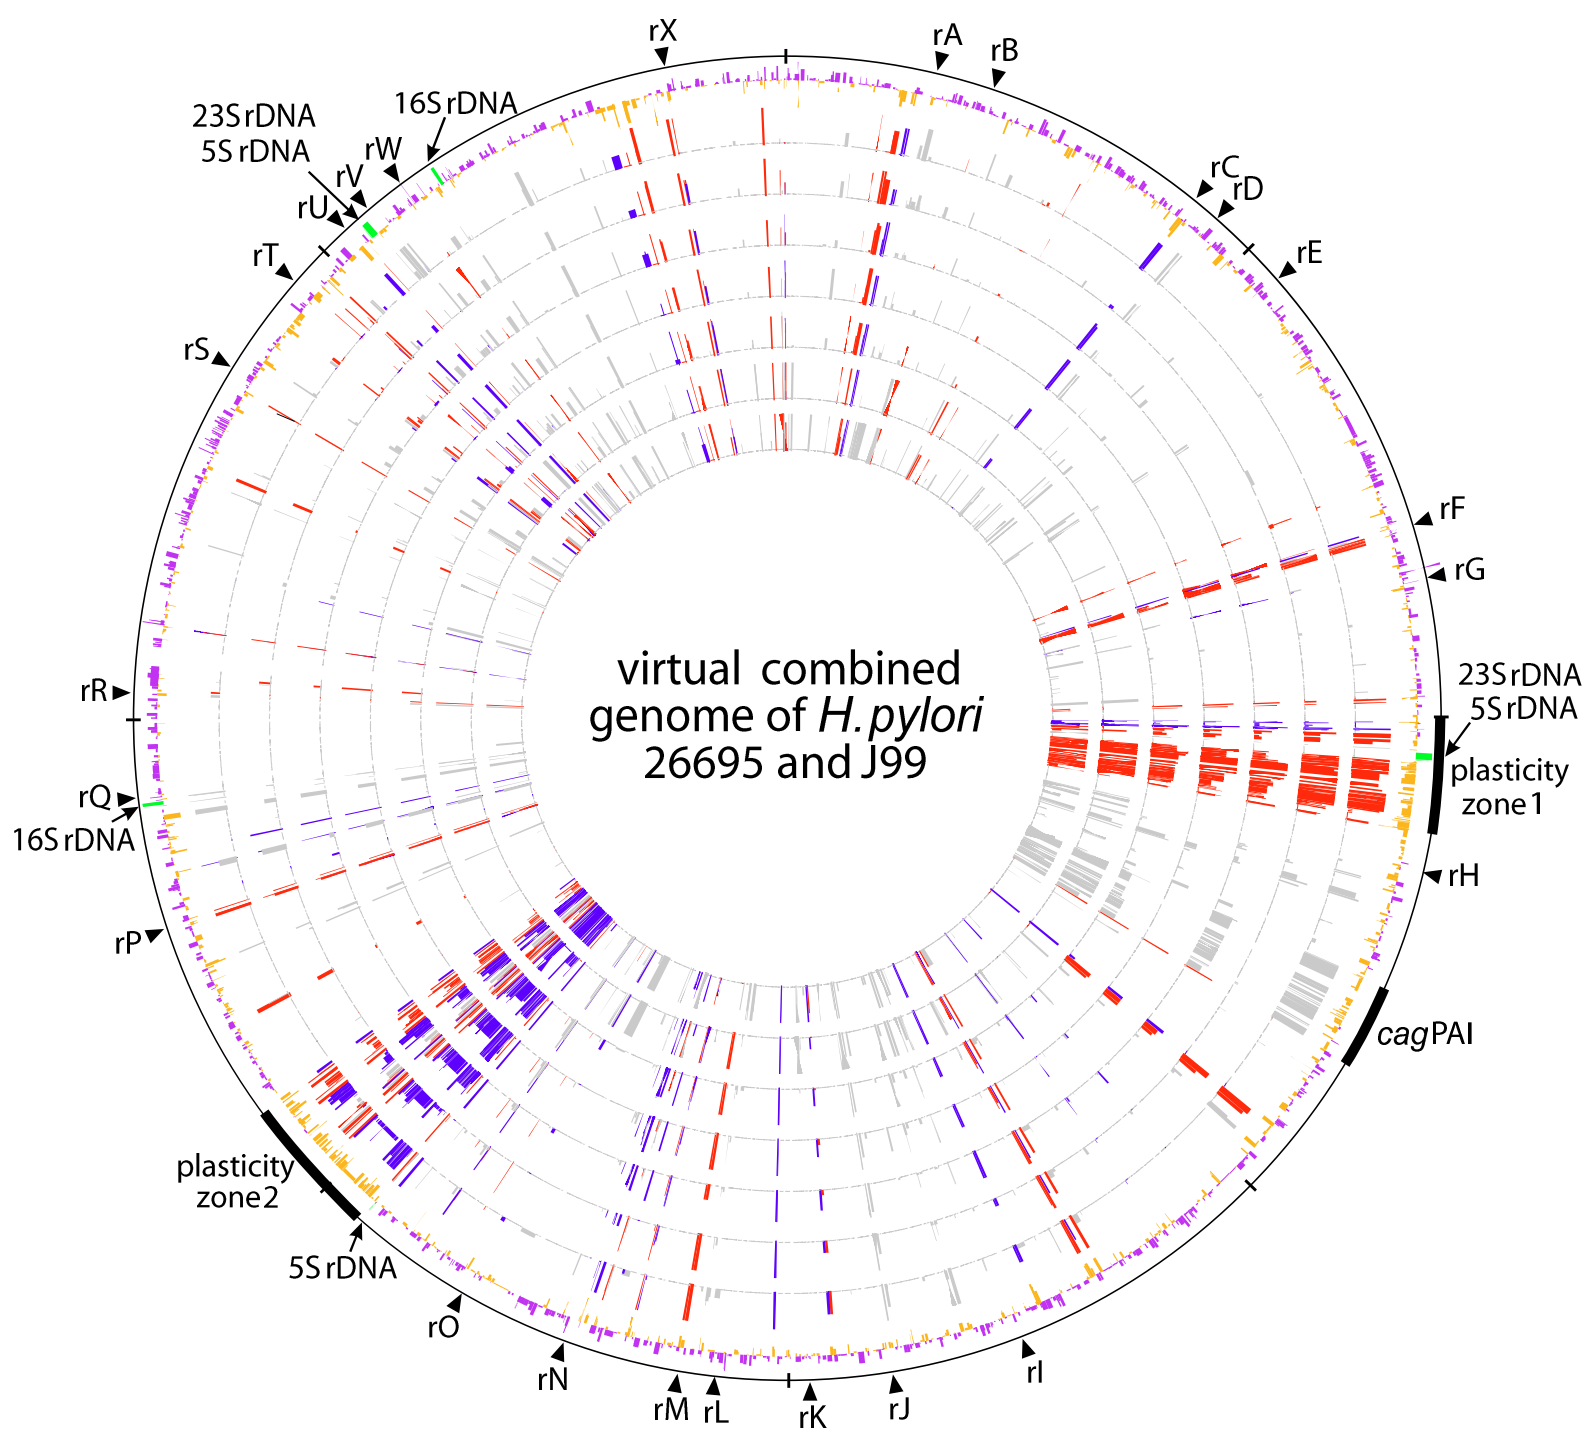

Supplement: pgen.0010043.sg002.pdf [file pgen.0010043.sg002.pdf]

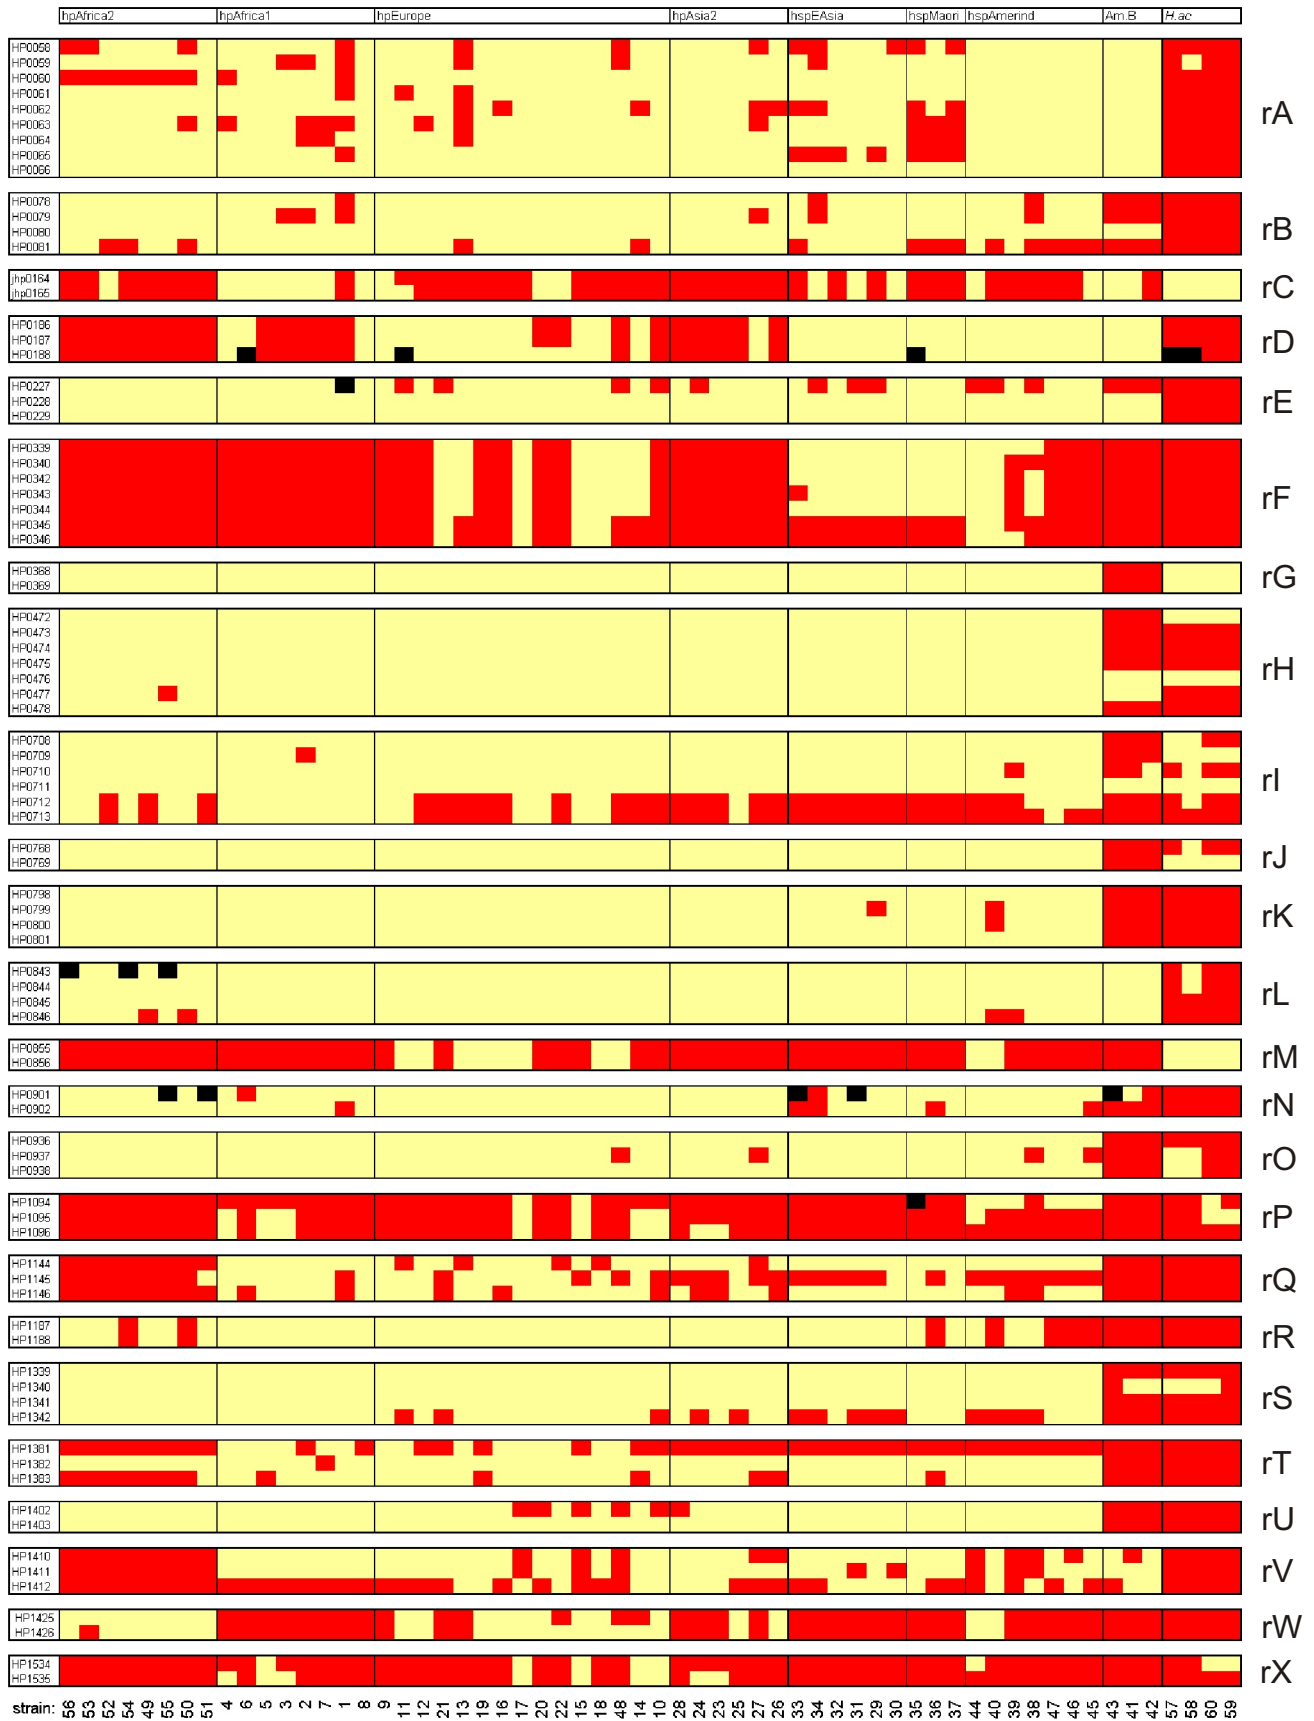

strain: 56 53 52 54 49 55 50 51 4 6 5 3 2 7 1 8 9 11 12 21 13 19 16 17 20 22 15 18 48 14 10 28 24 23 25 27 26 33 34 32 31 29 30 36 36 37 44 40 39 38 47 46 45 43 41 42 57 58 60 59

Supplement: pgen.0010043.sg003.pdf [file pgen.0010043.sg003.pdf]

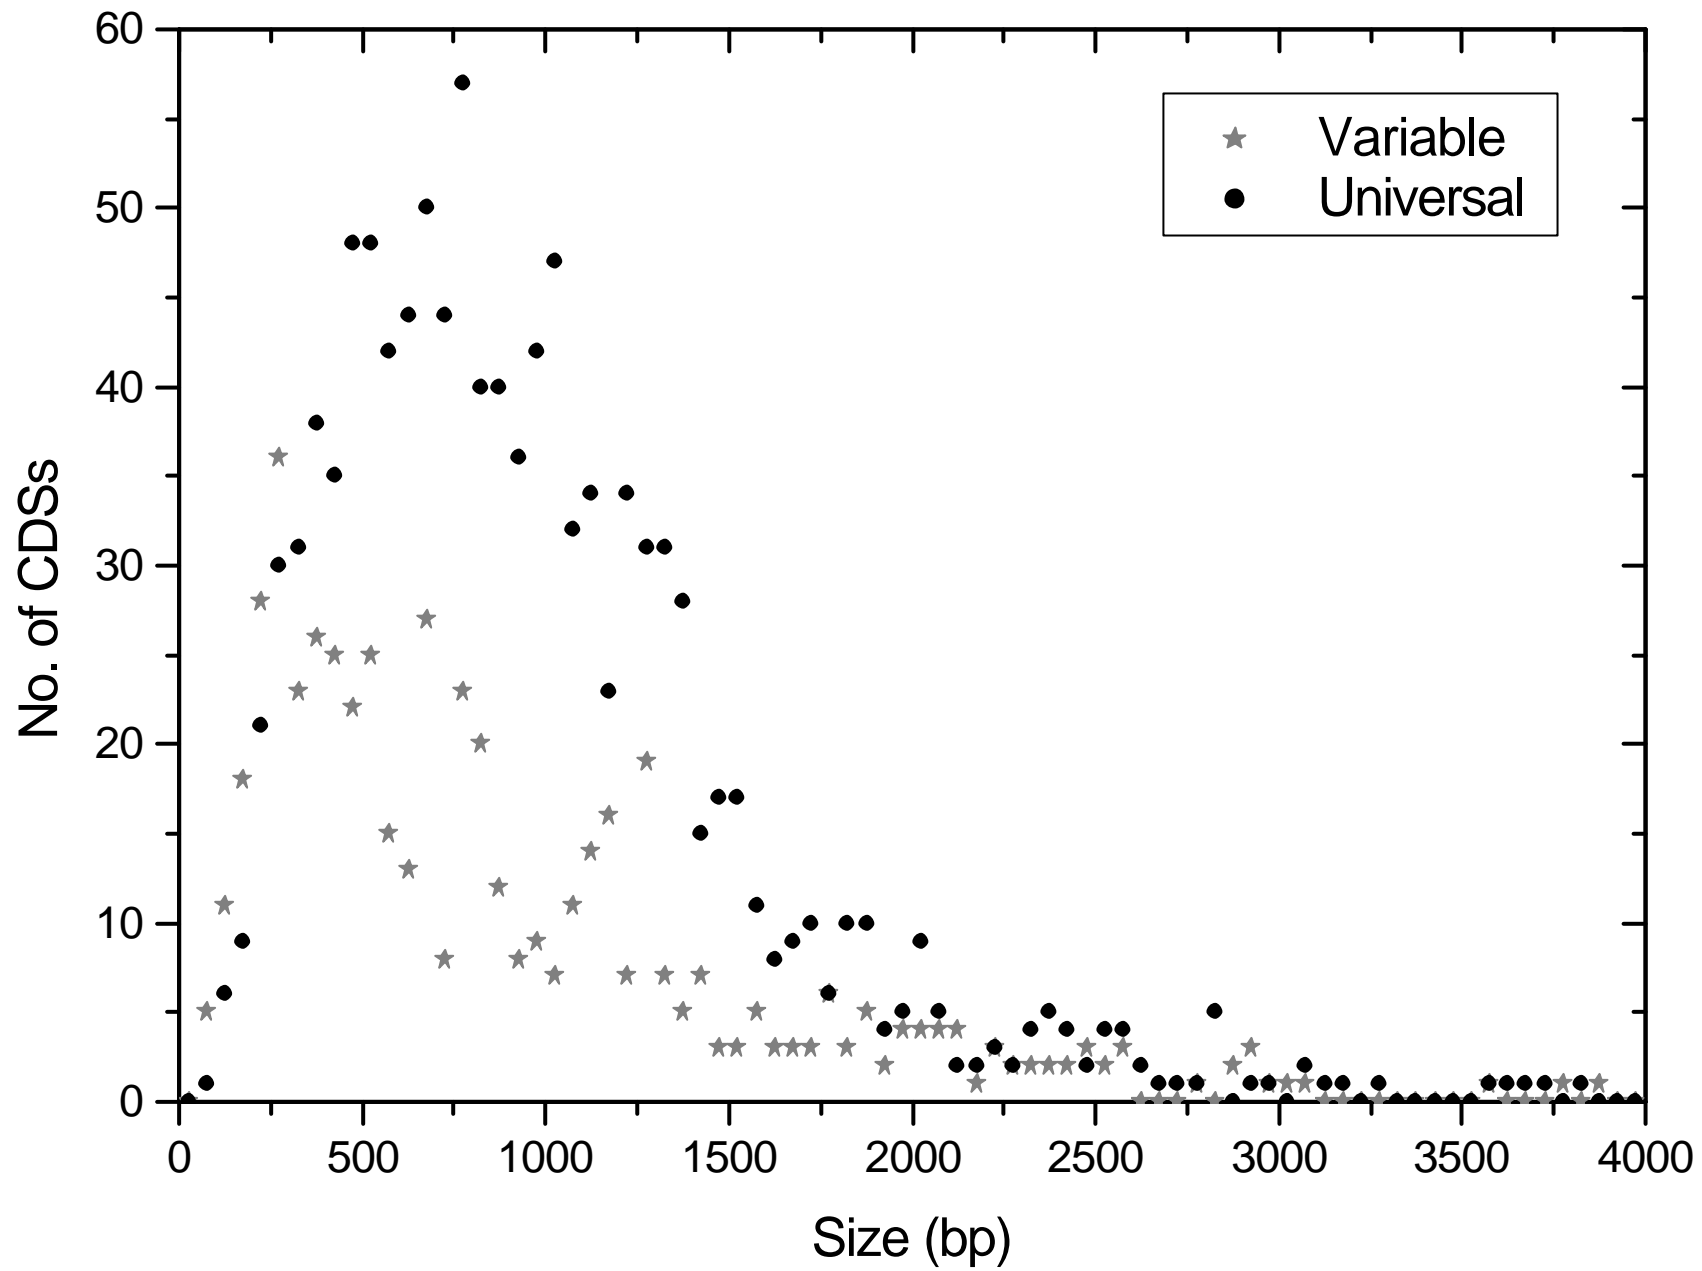

Supplement: pgen.0010043.sg004.pdf [file pgen.0010043.sg004.pdf]

162.0

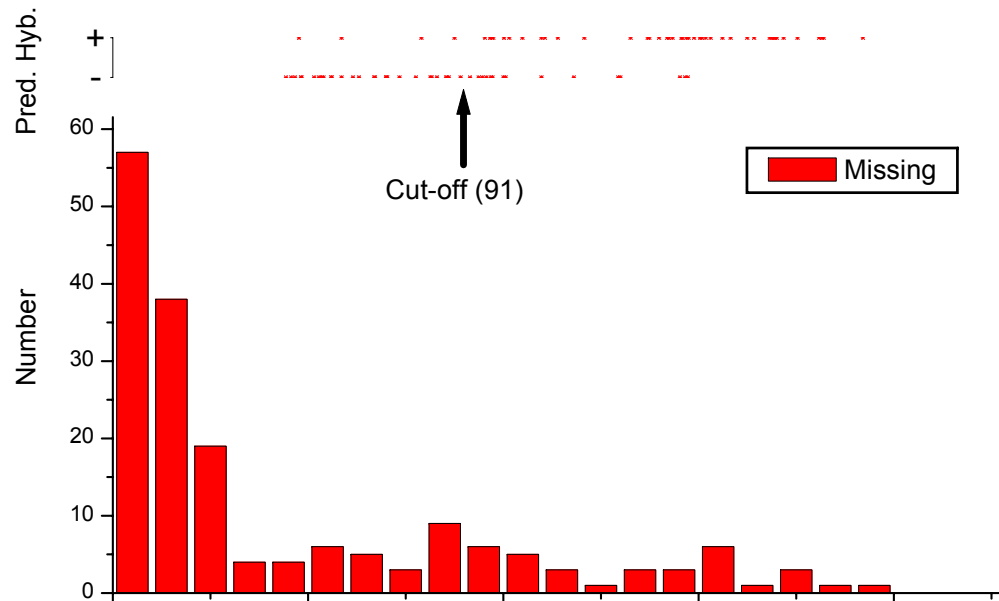

Sheba

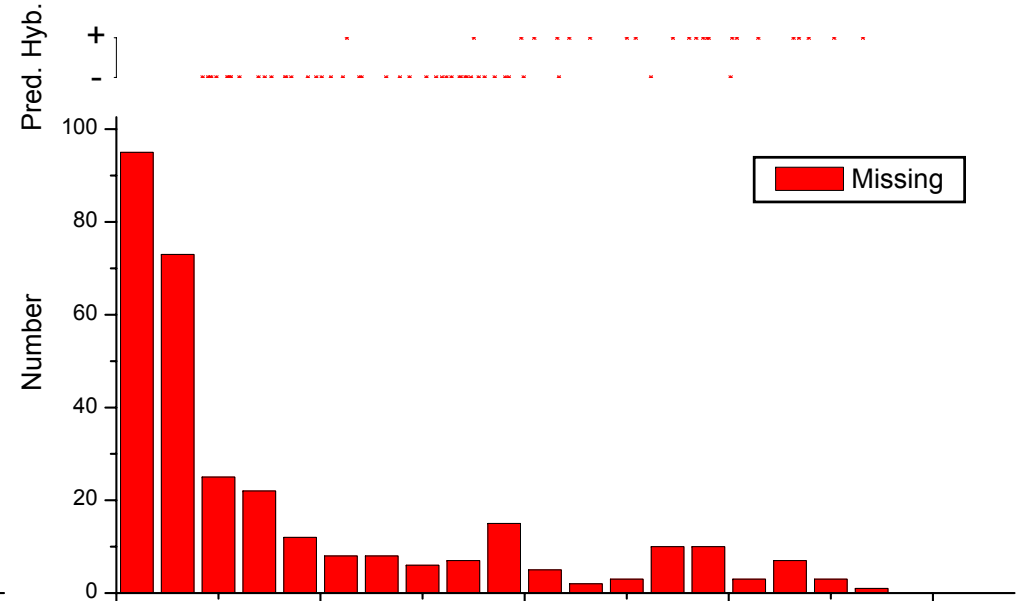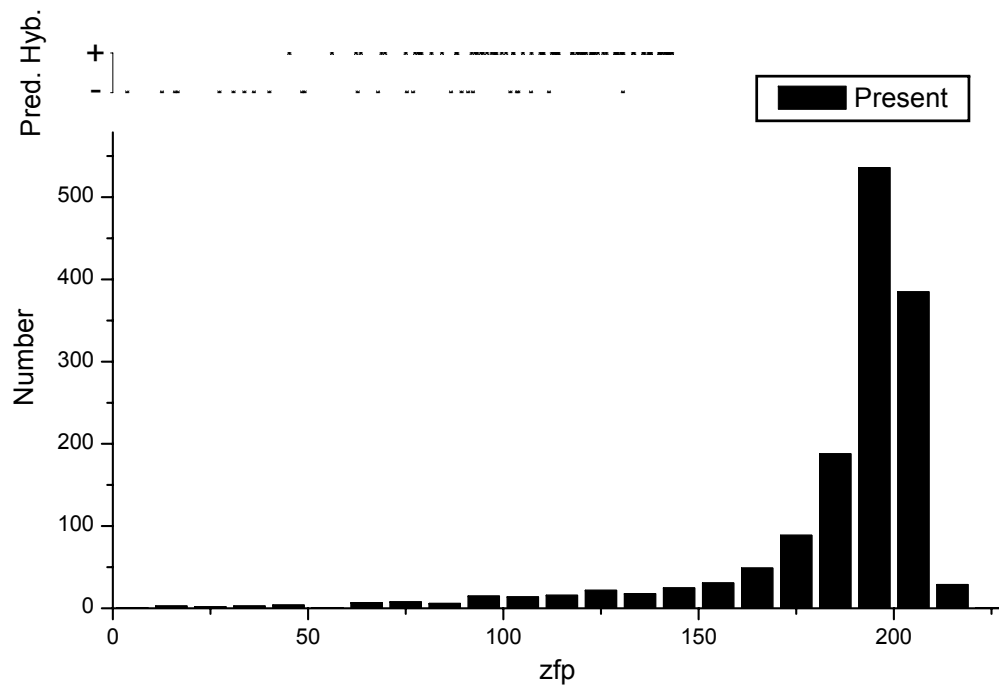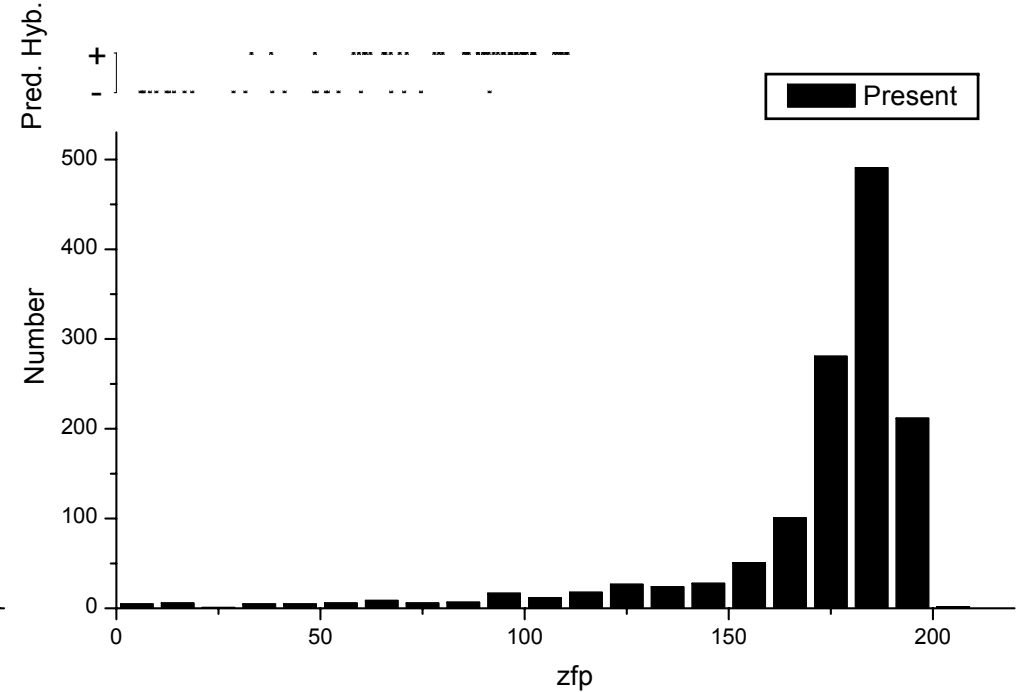

Supplement: pgen.0010043.sg005.pdf [file pgen.0010043.sg005.pdf]
